# Supplementary material
Source: Springer Nature journal article supplement (https://www.springermedizin.de/resource/supplementary/12965_2011_94_MOESM8_ESM.pdf/9573092)

A

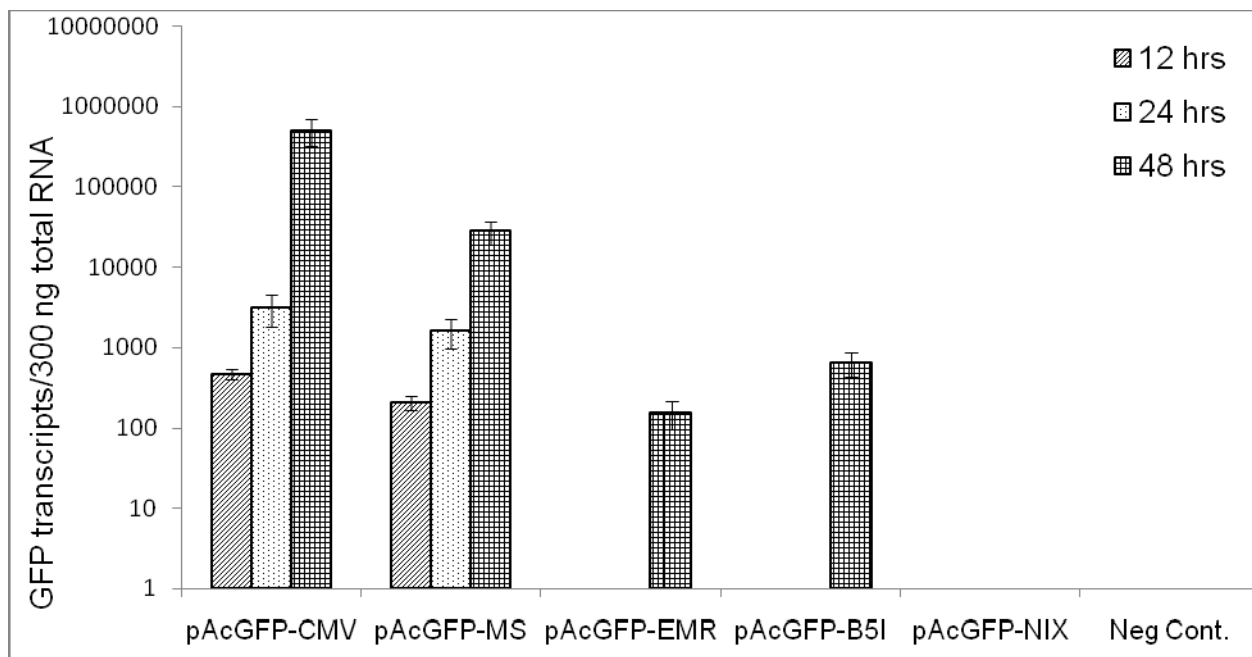

B

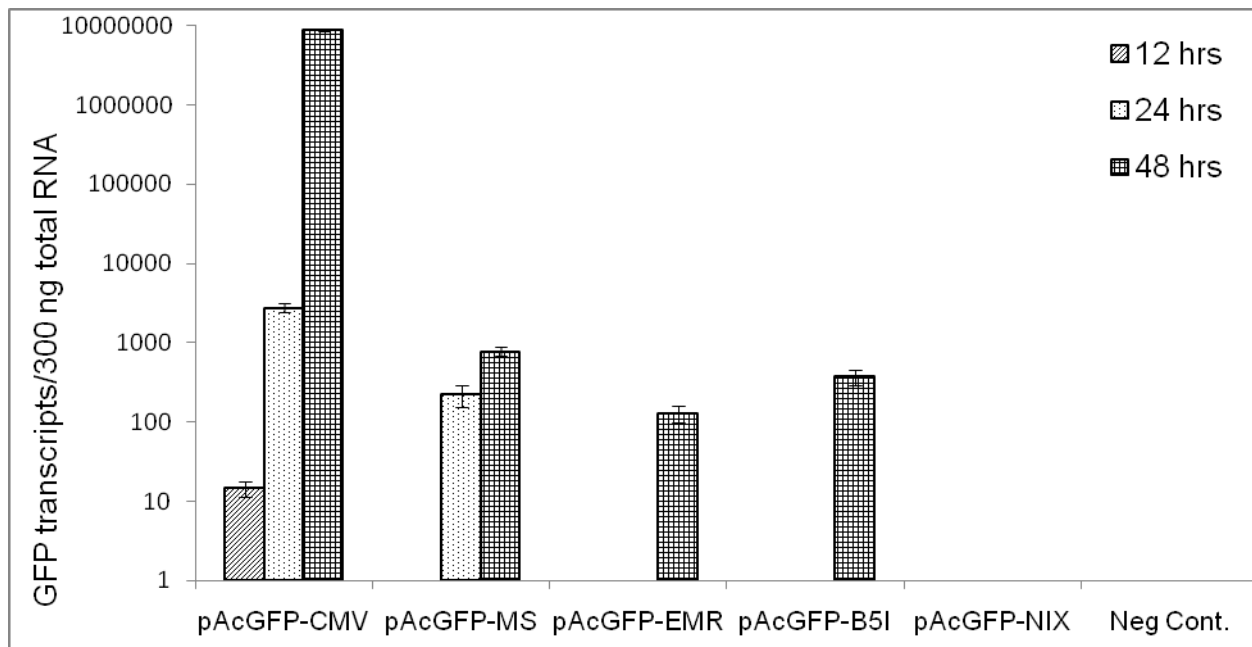

Supplement: MOESM8 [file 9573092]
